# Supplementary material
Source: publisher site journal article supplement (https://www.spandidos-publications.com/669/downloadSupplementary)
Supplement: Supplementary file 1 [file downloadSupplementary]

Figure S1. ROC analysis of the four-long non-coding RNA signature in predicting the overall survival rate of patients with different breast cancer stages. (A) ROC curves of stage I. (B) ROC curves of stage II. (C) ROC curves of stage III. (D) ROC curves of stage IV. ROC, receiver operating characteristic; AUC, area under the curve.

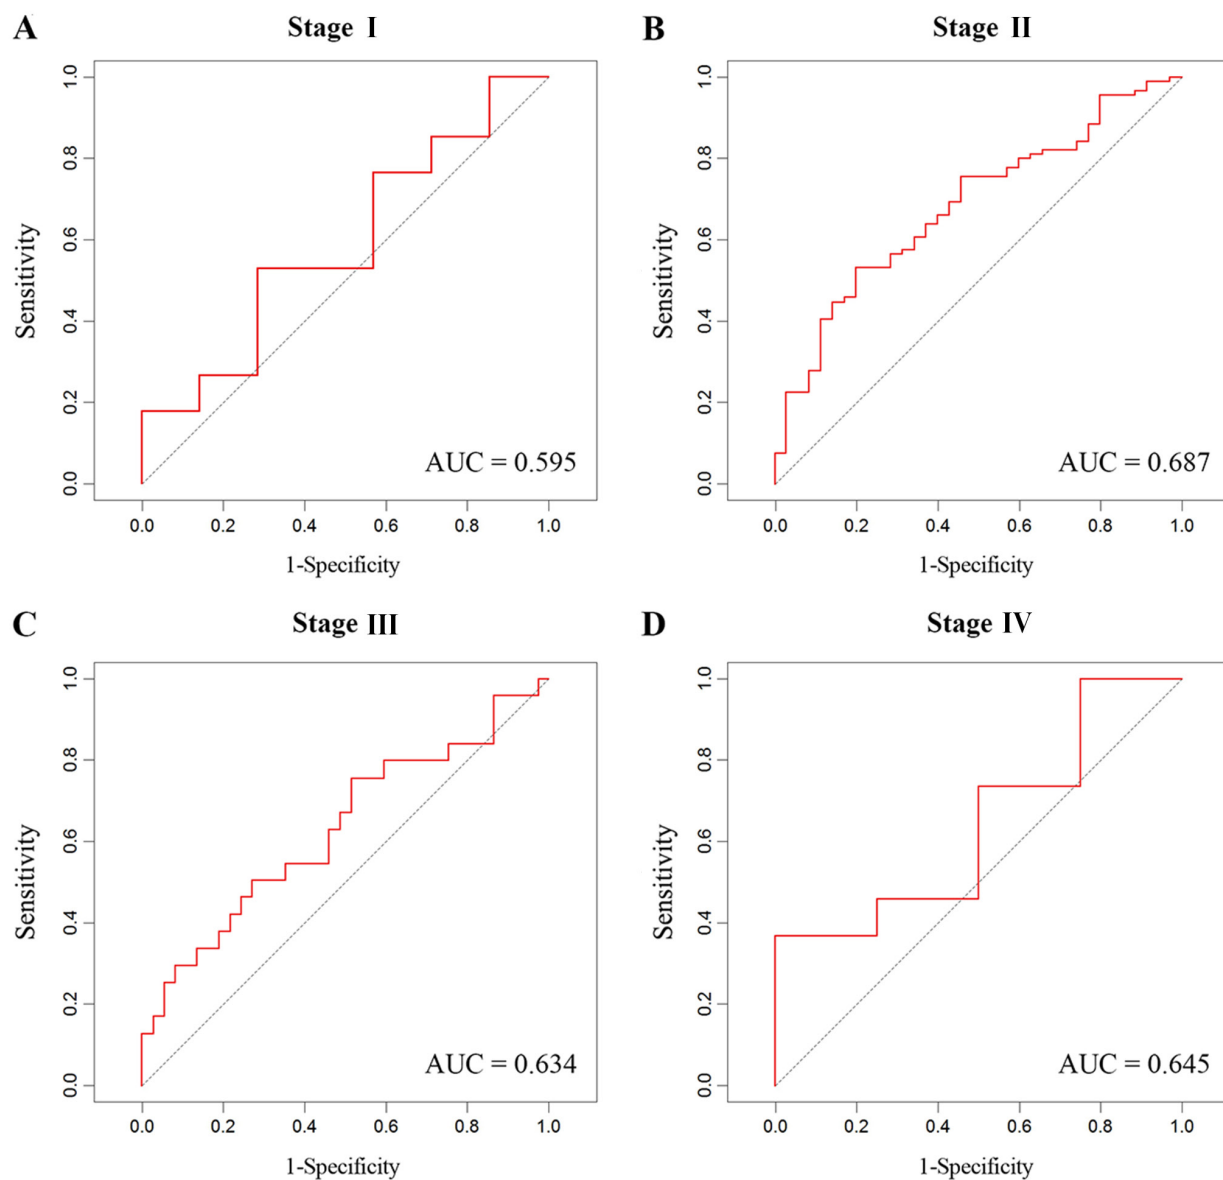

Figure S2. ROC analysis of the four-long non-coding RNA signature in predicting the overall survival of patients with different breast cancer subtypes. (A) ROC curves of luminal-A subtype. (B) ROC curves of luminal-B subtype. (C) ROC curves of HER2-amplified subtype. (D) ROC curves of triple-negative subtype. HER2, human epidermal growth factor receptor 2; ROC, receiver operating characteristic; AUC, area under the curve.

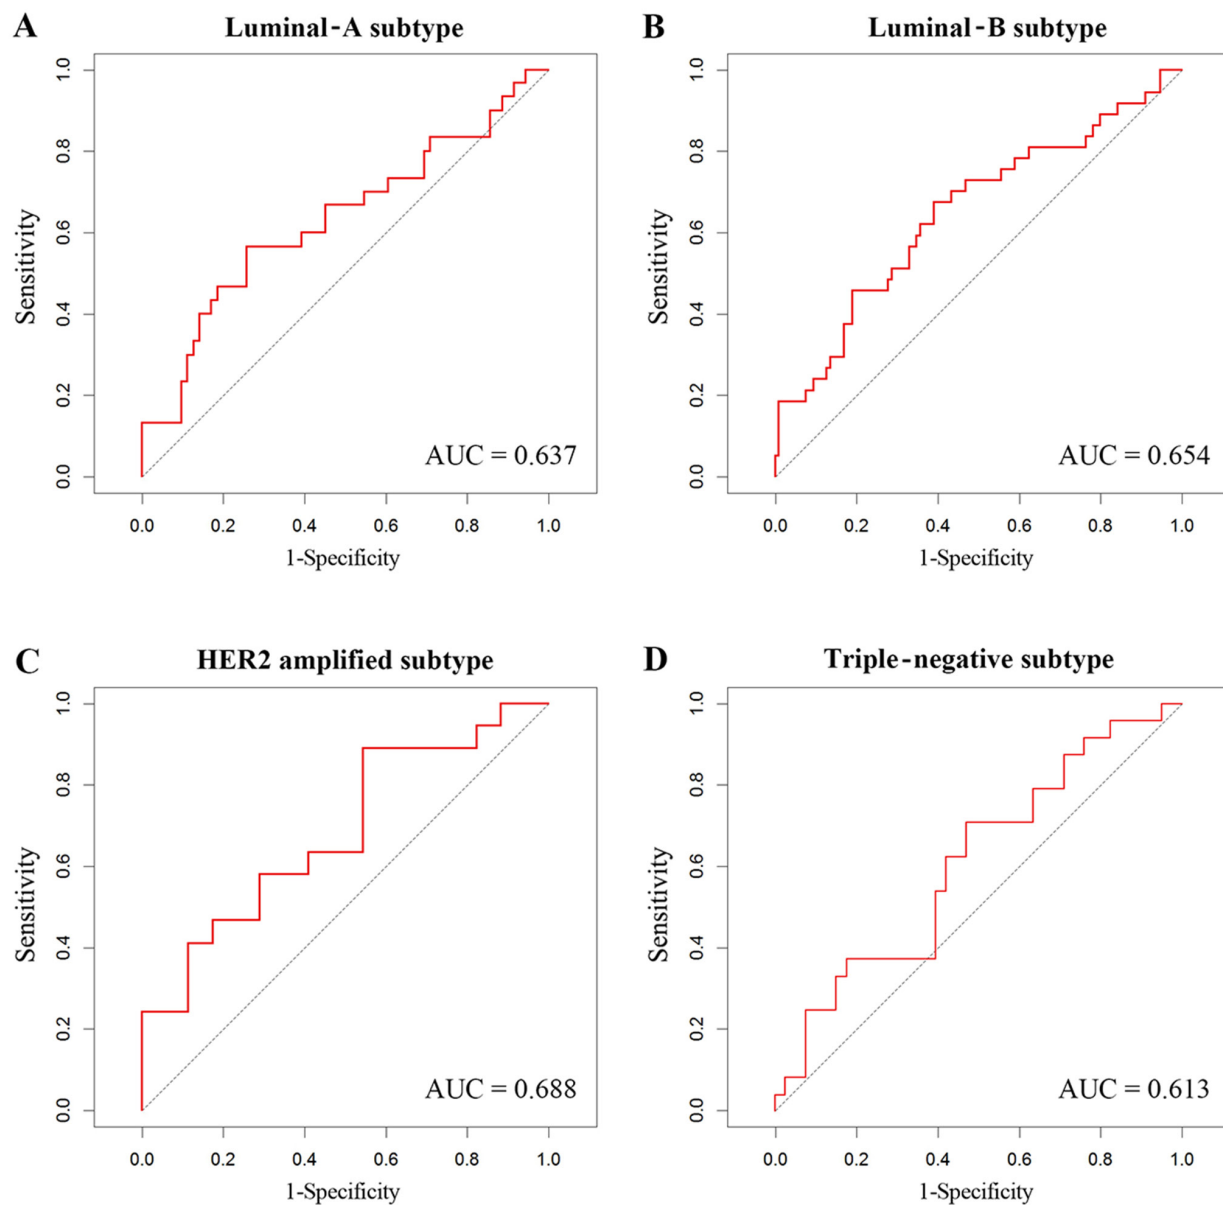

Figure S3. ROC analysis of the four individual long non-coding RNAs in predicting the overall survival of patients with breast cancer. (A) ROC curves of *PVT1*. (B) ROC curves of *MAPT-AS1*. (C) ROC curves of *LINC00667*. (D) ROC curves of *LINC00938*. ROC, receiver operating characteristic; AUC, area under the curve.

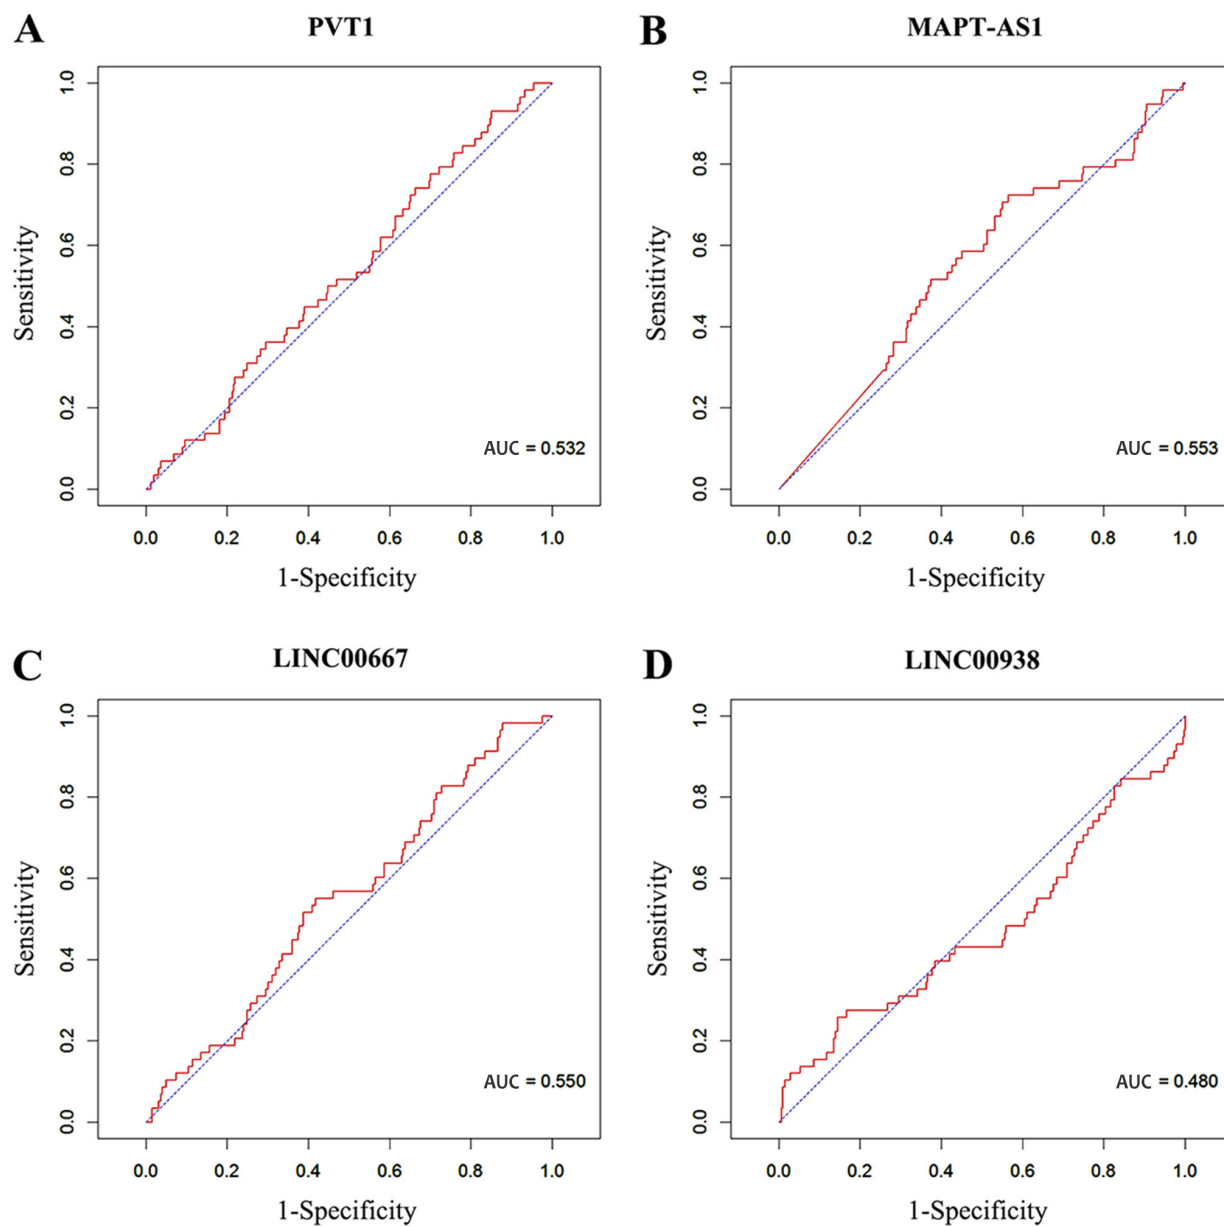

Figure S4. Kaplan-Meier analysis of the four individual long non-coding RNAs for patients in the validation set. (A) *PVT1* expression and overall survival rate of patients. (B) *MAPT-AS1* expression and overall survival rate of patients. (C) *LINC00667* expression and overall survival rate of patients. (D) *LINC00938* expression and overall survival rate of patients. ROC, receiver operating characteristic; AUC, area under the curve.

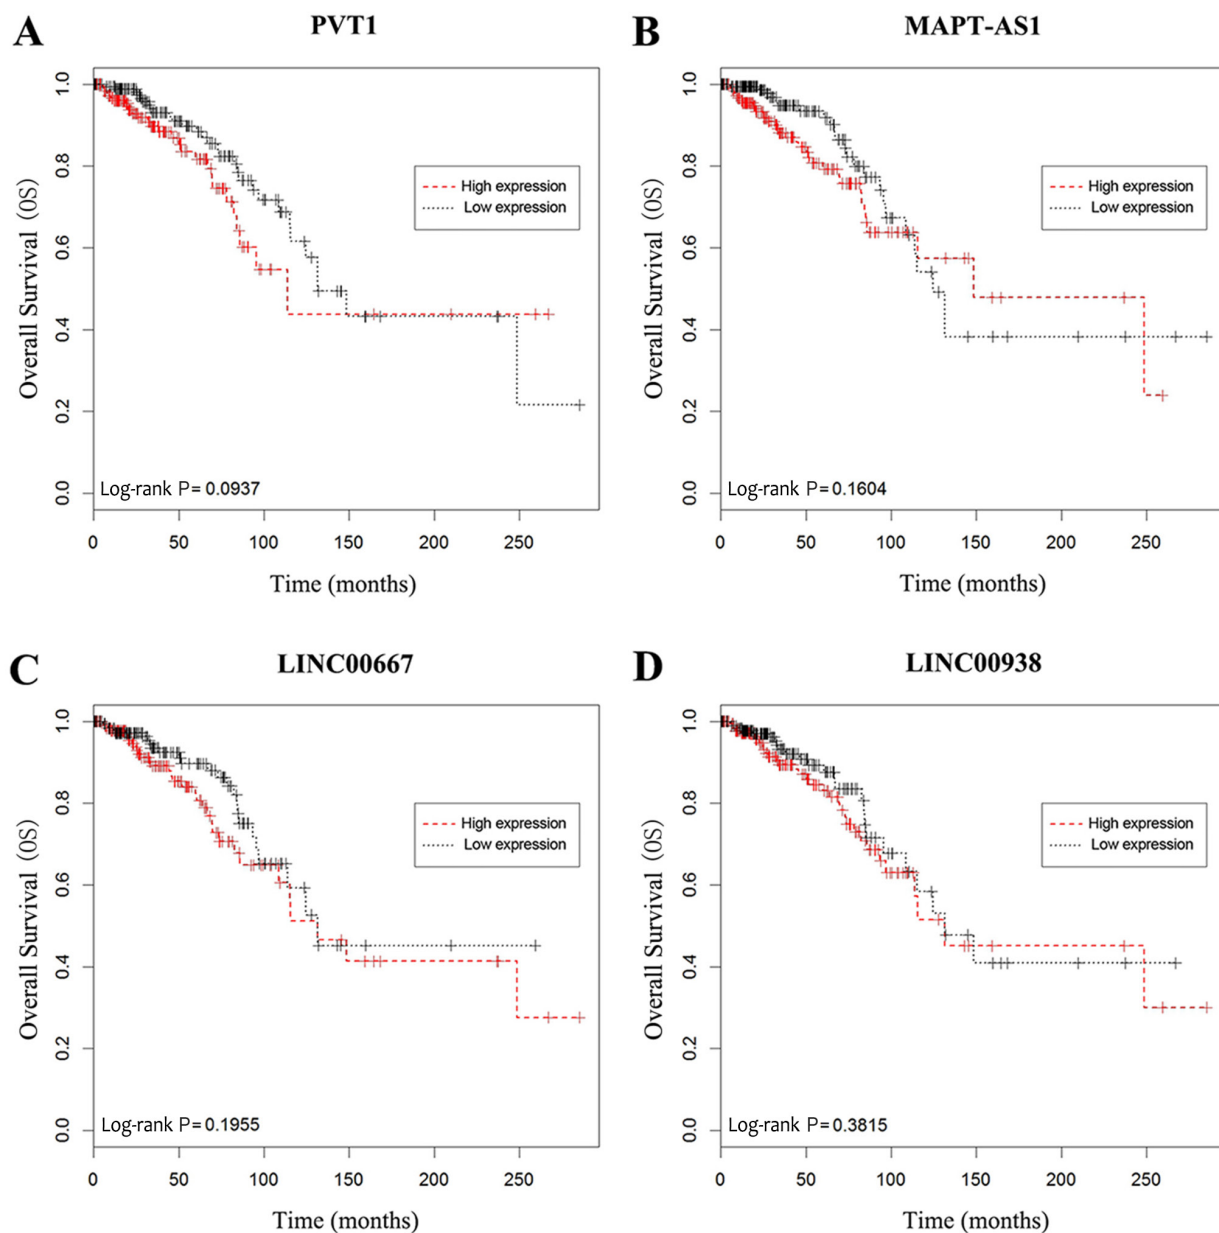

Table SI. Identified multi-gene-based prognostic signatures.

| Equation                   | Gene list  | P-value for model | Coefficients |
|----------------------------|------------|-------------------|--------------|
| Equation 5890              | PVT1       | 0.011237          | -0.011912    |
|                            | LINC00426  |                   | -2.425667    |
|                            | MAPT-AS1   |                   | -0.208763    |
|                            | LINC00284  |                   | 0.048413     |
| Equation 6962 <sup>a</sup> | PVT1       | 0.012978          | -0.014933    |
|                            | MAPT-AS1   |                   | -0.192908    |
|                            | LINC00667  |                   | -0.115852    |
|                            | LINC00938  |                   | 0.097700     |
| Equation 7110              | PVT1       | 0.033481          | -0.014241    |
|                            | MAPT-AS1   |                   | -0.208820    |
|                            | LINC00938  |                   | 0.077830     |
|                            | ZBED3-AS1  |                   | -0.802399    |
| Equation 7119              | PVT1       | 0.029604          | -0.015102    |
|                            | MAPT-AS1   |                   | -0.152013    |
|                            | LINC00938  |                   | 0.095360     |
|                            | BAIAP2-AS1 |                   | -0.074602    |
| Equation 7127              | PVT1       | 0.034159          | -0.019291    |
|                            | MAPT-AS1   |                   | -0.190000    |
|                            | LINC00938  |                   | 0.081094     |
|                            | TRHDE-AS1  |                   | -2.105226    |
| Equation 7419              | PVT1       | 0.041101          | -0.016929    |
|                            | LINC00667  |                   | -0.097757    |
|                            | LINC00938  |                   | 0.097434     |
|                            | BAIAP2-AS1 |                   | -0.100830    |
| Equation 9036              | PVT1       | 0.045329          | -0.021785    |
|                            | LINC00938  |                   | 0.085743     |
|                            | BAIAP2-AS1 |                   | -0.109909    |
|                            | TRHDE-AS1  |                   | -2.162419    |

<sup>a</sup>Equation was selected as the final prognostic signature for its performance in ROC analysis.
